# Supplementary material for: The APOE-R136S mutation protects against APOE4-driven Tau pathology, neurodegeneration and neuroinflammation
Source: PubMed Central journal article supplement (PMC10689245; doi:10.1038/s41593-023-01480-8), 2023-11-13

Figure 3

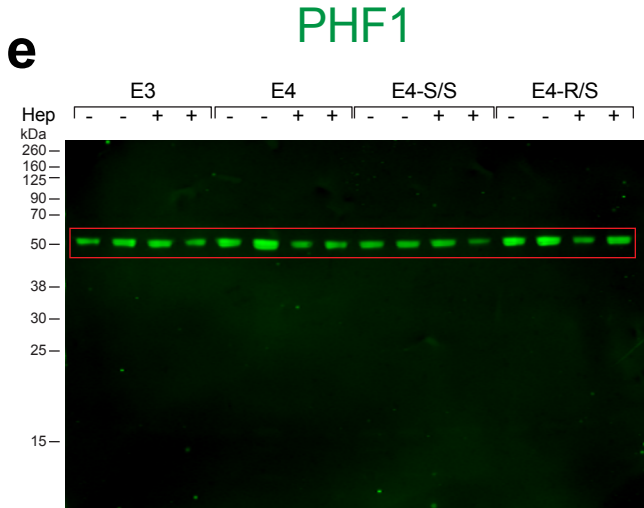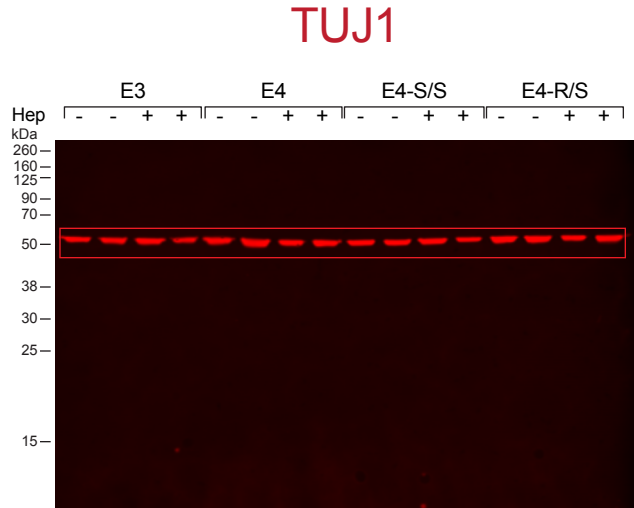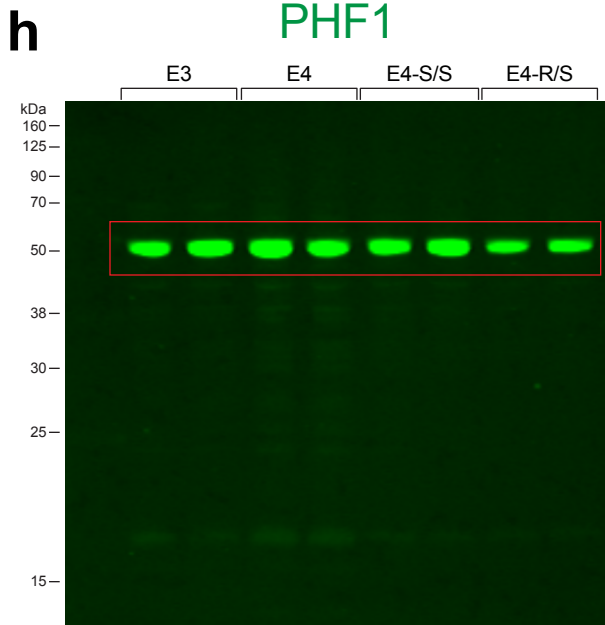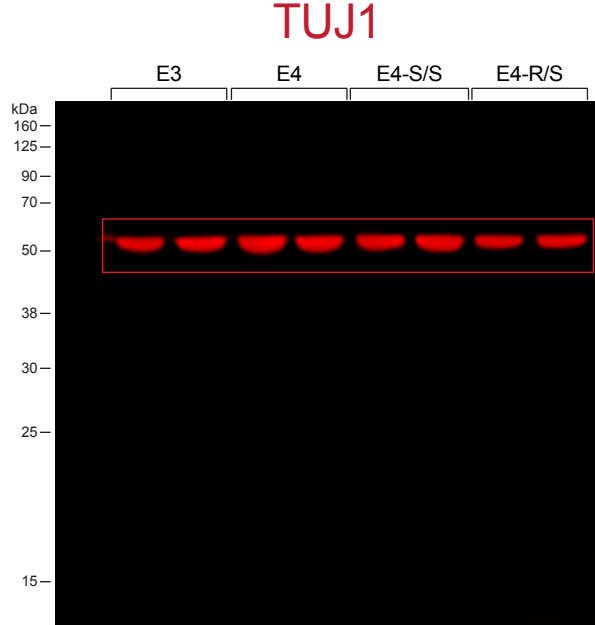

Supplement: 41593_2023_1480_MOESM15_ESM.pdf [file 41593_2023_1480_MOESM15_ESM.pdf]
